# Supplementary material for: Direct detection of dithiocarbamate fungicides by SALDI/MS using porous TiC ceramic powder as a substrate
Source: Royal Society of Chemistry journal article supplement (doi:10.1039/d3ay01533e), 2024-01-01
Supplement: d3ay01533e1.pdf [file d3ay01533e1.pdf]

## Supplementary information

# Direct detection of dithiocarbamate fungicides by SALDI/MS using porous TiC ceramic powder as substrate

Hiroshi Moriwaki<sup>a,b\*</sup>, Issey Osaka<sup>c</sup>, Kotaro Hashimoto<sup>c</sup>, Osamu Yamada<sup>d</sup>

<sup>a</sup> Shinshu University, Department of Applied Biology, Faculty of Textile Science and Technology, 3-15-1, Tokida, Ueda 386-8567, Japan

<sup>b</sup> Shinshu University, Research Initiative for Supra-Materials, Interdisciplinary Cluster for Cutting Edge Research, 3-15-1, Tokida, Ueda 386-8567, Japan

<sup>c</sup> Department of Pharmaceutical Engineering, Faculty of Engineering, Toyama Prefectural University, 5180, Kurokawa, Imizu, 939-0398, Japan

<sup>d</sup> OSU Co., Ltd., 3-1-1, Nakagaito, Daito 574-8530, Japan

\* Corresponding author. E-mail address: moriwaki@shinshu-u.ac.jp (H. Moriwaki).

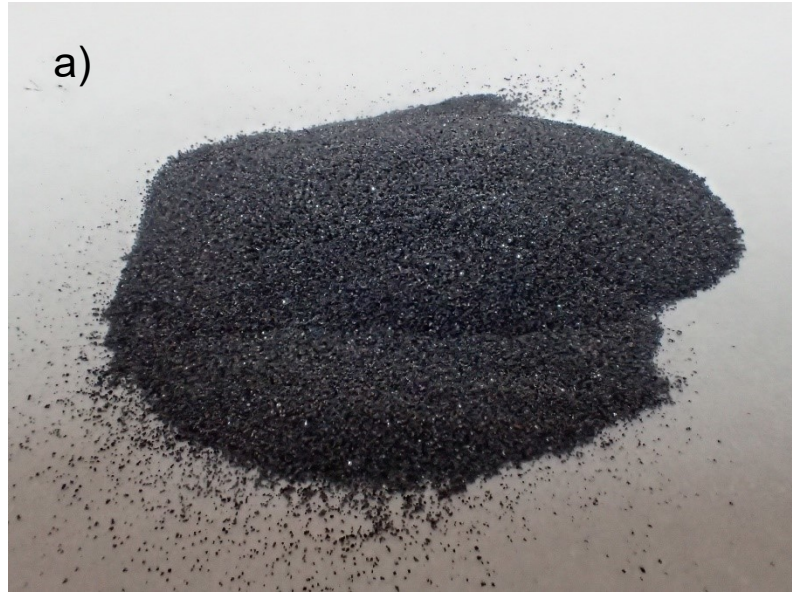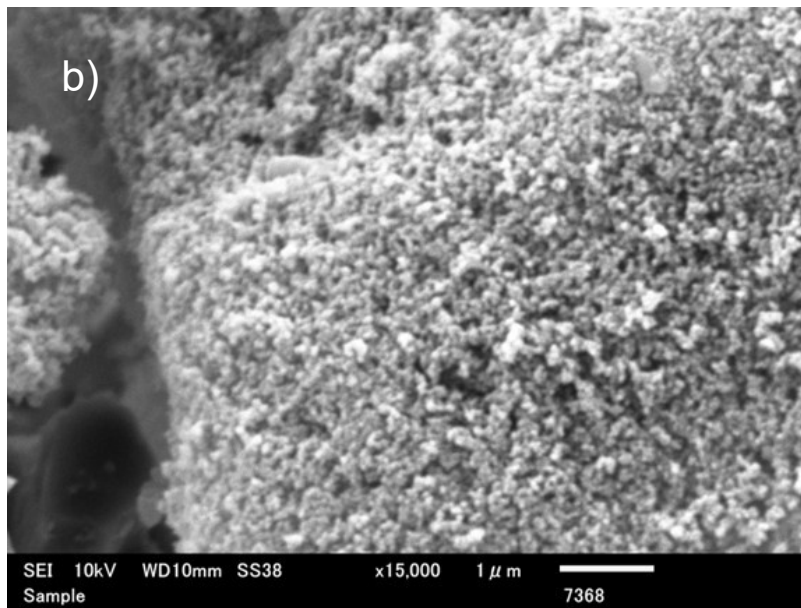

Fig. S1 a) Picture of the porous TiC ceramic powder. b) SEM image of the TiC ceramic powder.

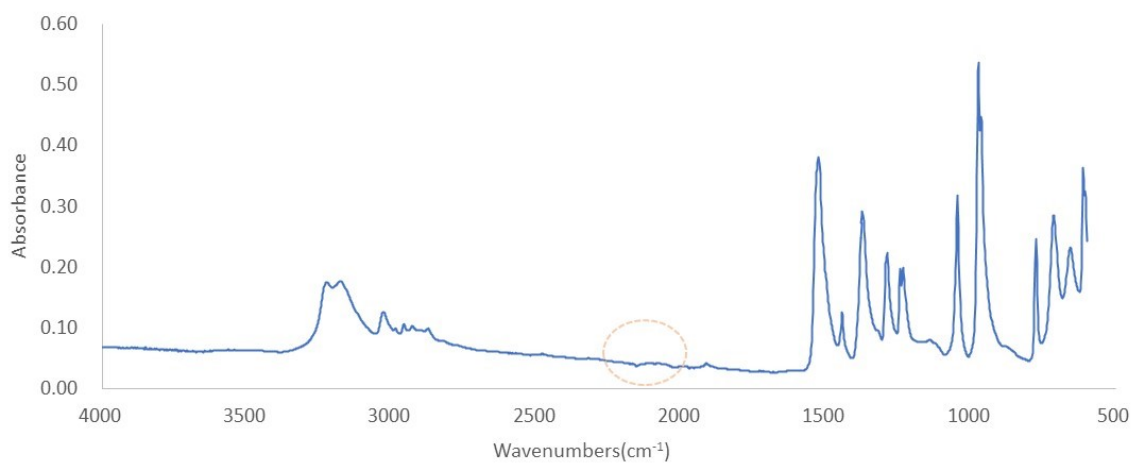

Fig. S2 IR spectrum of Zineb

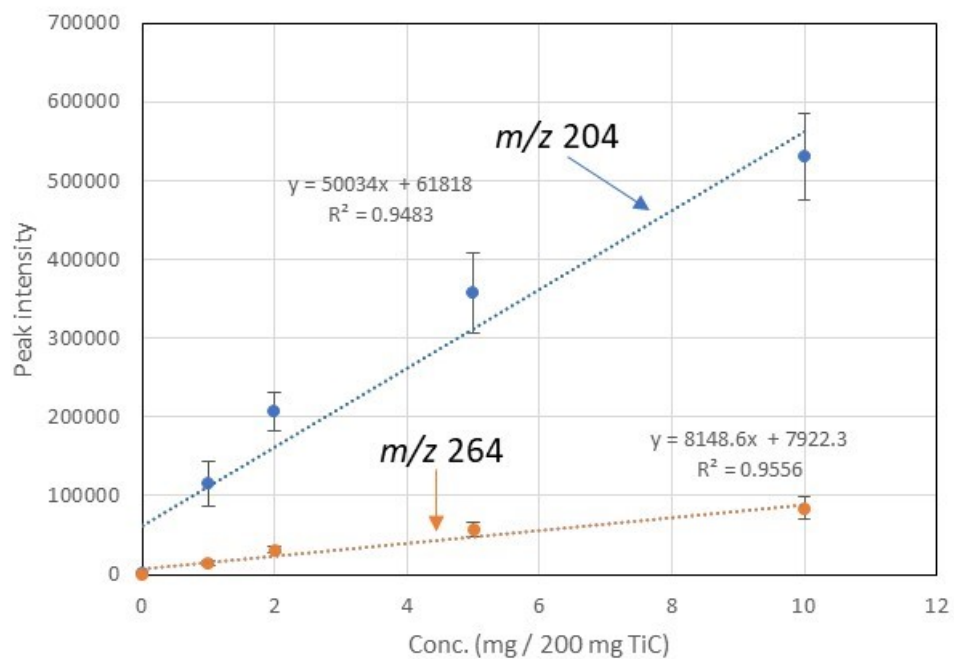

Fig. S3 Calibration curves of Mancozeb in the absence of the internal standard using the peak intensities at  $m/z$  204 and 264.

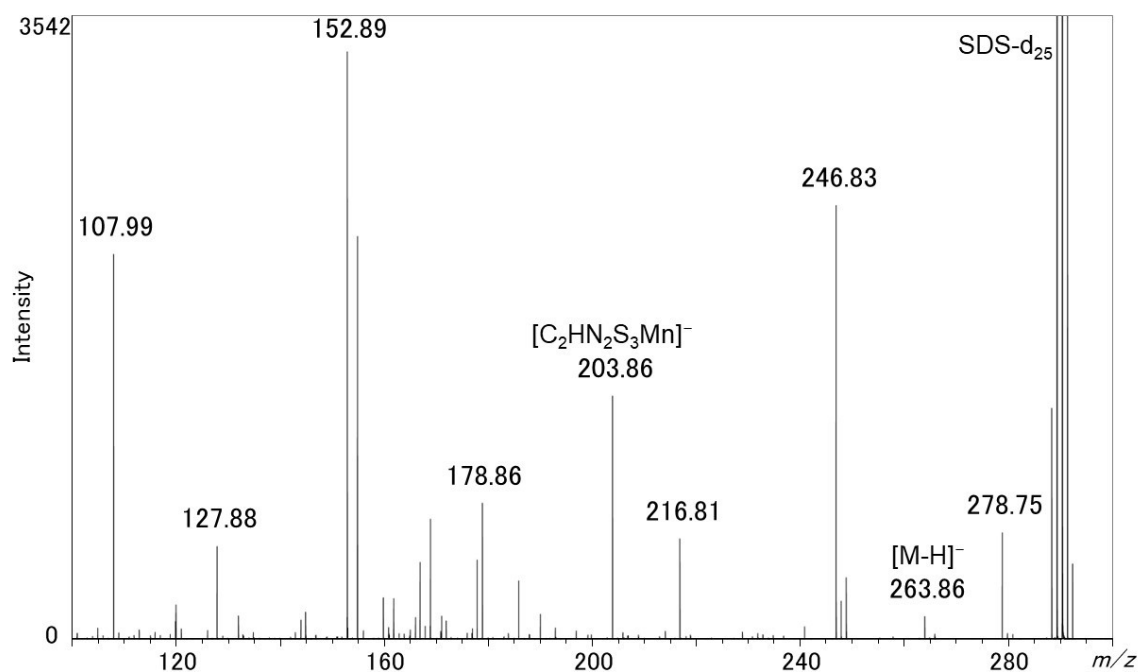

Fig. S4 SALDI/MS spectrum of the powder obtained by adding 200 mg of TiC powder adsorbed an internal standard (SDS-d<sub>25</sub>) to an aqueous suspension of a commercial DTC pesticide (Ziman-dithane, 10 mg), stirring, filtering, washing with water, and drying.
